# Supplementary material for: Evaluating the Ribosomal Internal Transcribed Spacer (ITS) as a Candidate Dinoflagellate Barcode Marker
Source: PLoS One. 2012 Aug 16;7(8):e42780. doi: 10.1371/journal.pone.0042780 (PMC3420951; doi:10.1371/journal.pone.0042780)
Supplement: Table S1 — List of all dinoflagellate strains used in this study with their new barcode identity. Species identities are based on 2% species cut off value. Species highlighted in orange type show incongruities between strain names and barcode identities. Strain synonyms (SS) are given in column G. For Symbiodinium, culture collection names in parenthesis record the name given for their respective GenBank accession number. Symbiodinium chloroplast 23S genotypes (Cp) are shown in brackets. (XLS) [file pone.0042780.s006.xls]

## Sheet: Sheet1
Table S1
Species	ITS barcode identity	COI barcode	COI barcode identification	ITS barcode (this study)	Genbank accession	Culture Collection
Akashiwo sanguinea	Akashiwo sanguinea			DINO1219-08	FJ823504.1	NEPCC 885
Akashiwo sanguinea	Akashiwo sanguinea	GQ501112	Akashiwo sanguinea		DQ779987	CCMP 1593
Akashiwo sanguinea	Akashiwo sanguinea				DQ779988	CCMP 1837
Alexandrium affine	Alexandrium affine	GQ501116	Alexandrium affine	DINO1173-08	FJ823505	NEPCC 667
Alexandrium affine	Alexandrium affine				AJ632095	IEO-PA8V
Alexandrium affine	Alexandrium affine				DQ176665	AC-1
Alexandrium affine	Alexandrium affine				EF579793	None given
Alexandrium affine	Alexandrium affine				AJ632094	IEO-PA4V
Alexandrium affine	Alexandrium affine				DQ176664	AS-1
Alexandrium affine	Alexandrium affine	GQ501118	Alexandrium sp.		AY831409	CCMP 112
Alexandrium affine	Alexandrium affine				AB006995	HI
Alexandrium catenella	ATC group IV				AJ608264	ATTL02
Alexandrium catenella	ATC group IV				AJ580318	CNR-ACATS2
Alexandrium catenella	ATC group IV				AJ580323	CSIC-6T
Alexandrium catenella	ATC group IV				AJ968682	IEO-594
Alexandrium catenella	ATC group IV				AJ608263	ATLL01
Alexandrium catenella	ATC group IV				AJ580317	CNR-ACATC2
Alexandrium catenella	ATC group IV				AJ580319	CNR-ACATS1
Alexandrium catenella	ATC group IV				AJ580320	CNR-ACATS3
Alexandrium catenella	ATC group IV				AJ580325	CSIC-5T
Alexandrium catenella	ATC group IV				AJ608265	CSIC-8T
Alexandrium catenella	ATC group IV				AJ580321	CSIC-C5
Alexandrium catenella	ATC group IV				AJ968681	IEO-175
Alexandrium catenella	ATC group IV				AJ968680	IEO-816
Alexandrium catenella	ATC group IV				AJ630645	IEO-AC9C
Alexandrium catenella	ATC group IV				AB006990	MI7
Alexandrium catenella	ATC group IV				AJ580322	CSIC-C7
Alexandrium catenella	ATC group IV				AJ968683	IEO-709
Alexandrium catenella	ATC group IV				EF030049	ACDH
Alexandrium cohorticula	Tropical Asian				AF145224	None given
Alexandrium kutnerae	ATC group II				AM238515	IEO-VGO617
Alexandrium lusitanicum	Alexandrium minutum	GQ501141	Alexandrium sp.	DINO1182-08	FJ823507.1	CCMP 1888
Alexandrium margalefi	Alexandrium margalefi			DINOB742-08	FJ823508.1	CS-322
Alexandrium minimum	Alexandrium minutum	GQ501146	Alexandrium sp.	DINO365-07	FJ823509.1	NEPCC 820
Alexandrium minutum	Alexandrium minutum	GQ501149	Alexandrium sp.	DINOB750-08	FJ823514.1	CS-323/01
Alexandrium minutum	Alexandrium minutum	GQ501152	Alexandrium sp.	DINOB772-08	FJ823519.1	CS-324/12
Alexandrium minutum	Alexandrium minutum	GQ501154	Alexandrium sp.	DINOB776-08	FJ823521.1	CS-324/13
Alexandrium minutum	Alexandrium minutum			DINOB775-08	FJ823520.1	CS-324/14
Alexandrium minutum	Alexandrium minutum	GQ501147	Alexandrium sp.	DINOB744-08	FJ823511.1	CS-324/15
Alexandrium minutum	Alexandrium minutum			DINOB747-08	FJ823512.1	CS-324/16
Alexandrium minutum	Alexandrium minutum			DINOB754-08	FJ823517.1	CS-325/19
Alexandrium minutum	Alexandrium minutum	GQ501157	Alexandrium sp.	DINOB768-08	FJ823518	CS-325/20
Alexandrium minutum	Alexandrium minutum	GQ501153	Alexandrium sp.	DINOB966-08	FJ823522.1	CS-325/25
Alexandrium minutum	Alexandrium minutum			DINOB753-08	FJ823516	CS-325/27
Alexandrium minutum	Alexandrium minutum	GQ501155	Alexandrium sp.	DINOB751-08	FJ823515.1	CS-323/02
Alexandrium minutum	Alexandrium minutum	GQ501143	Alexandrium sp.	DINOB749-08	FJ823513.1	CS-323/06
Alexandrium minutum	Alexandrium minutum			DINOB743-08	FJ823510	RCC 749
Alexandrium minutum	Alexandrium minutum			DINOB969-08	FJ823523.1	CS-323/08
Alexandrium minutum	Alexandrium minutum				AJ514922	IEO-AL1V
Alexandrium minutum	Alexandrium minutum				AJ514920	CNR-AMIA4PT
Alexandrium minutum	Alexandrium minutum				AJ620856	IEO-AL10C
Alexandrium minutum	Alexandrium minutum				AJ320539	IEO 4
Alexandrium minutum	Alexandrium minutum				AJ514923	IEO-AL3V
Alexandrium minutum	ATC group IV				EF030055	AMI
Alexandrium ostenfeldii	Alexandrium peruvianum				FJ011434	WW516
Alexandrium ostenfeldii	Alexandrium peruvianum				FJ011435	WW517
Alexandrium ostenfeldii	Alexandrium ostenfeldii				FJ011432	AOTVA1
Alexandrium ostenfeldii	Alexandrium ostenfeldii				FJ011433	AOTVA4
Alexandrium sp.	ATC group IV				DQ011617	gz
Alexandrium sp.	ATC group IV				DQ011616	qd1
Alexandrium tamarense ATC group III	ATC group III	GQ501181	Alexandrium sp.	DINO1188-08	FJ823524.1	CCMP 115
Alexandrium tamarense ATC group III	ATC group III	GQ501177	Alexandrium sp.-borderline	DINO1071-08	FJ823525.1	NEPCC 183 (SYNONYM CCMP115)
Alexandrium tamarense ATC group II	ATC group II				AJ491152	CNR-ATAA1
Alexandrium tamarense ATC group I	ATC group I				AF374227	AT-2
Alexandrium tamarense ATC group II	ATC group II				AM238652	SZN01
Alexandrium tamarense	ATC group IV				DQ176661	ATHK
Alexandrium tamarense	ATC group II				AM292308	CNR-ATAA3
Alexandrium tamarense ATC group I	ATC group I				AF374228	AT-6
Alexandrium tamarense	ATC group I				AF374224	AT-A
Alexandrium tamarense	ATC group I				AF374225	AT-B
Alexandrium tamarense	ATC group II				AM238651	IEO-VGO553
Alexandrium tamarense	ATC group II				AM238650	IEO-VGO654
Alexandrium tamarense ATC group I	ATC group I				AM292306	MDQ1096
Alexandrium tamarense	ATC group III				EF030056	AT-6
Alexandrium tamarense	ATC group IV				EF030052	ATDH
Alexandrium tamarense	ATC group IV				EU024795	ATNH01
Alexandrium tamarense	ATC group IV				AJ005048	CCMP 1493
Alexandrium tamarense	ATC group III				AJ514906	CNR-ATA4PT
Alexandrium tamarense	ATC group III				AJ514907	CNR-ATA6PT
Alexandrium tamarense	ATC group III				AJ514908	IEO-PE1V
Alexandrium tamarense	Tropical Asian				AB006992	CU-15
Alexandrium tamarense ATC group I	ATC group I				AF374226	AT-10
Alexandrium tamarense	ATC group II				AM292307	CNR-OR3
Alexandrium tamarense	ATC group IV				EF030048	ATCI02
Alexandrium tamarense	ATC group IV				EF030050	ATCI03
Alexandrium tamarense ATC group III	ATC group III				AB006991	WKS-1
Alexandrium tamarense	ATC group II				AB233377	OF935-AT6
Alexandrium peruvianum	Alexandrium peruvianum				AM237340	IEO-VGOAM10C
Alexandrium peruvianum	Alexandrium peruvianum				FJ011436	IEO-VGOAMD12
Amphidinium carterae	Amphidinium carterae			DINO352-07	FJ823526.1	RCC 88
Amphidinium carterae	Amphidinium carterae			DINO937-08	FJ823527.1	AC 208
Amphidinium carterae	Amphidinium carterae			DINO1199-08	FJ823528.1	CCAP 1102/3
Amphidinium carterae	Amphidinium carterae			DINO976-08	FJ823529.1	UTEX 2418
Amphidinium massartii	Amphidinium sp. group 1			DINO1077-08	FJ823531.1	NEPCC 802
Amphidinium rhynchocephalum	Amphidinium sp. group 1			DINO779-07	FJ823532.1	UTEX 1946
Amphidinium sp.	Amphidinium carterae			DINO1200-08	FJ823533.1	CCAP 1102-4
Calciodinellum tub*2 aff. levantinum	Calciodinellum tub*2 aff. levantinum				AY499532	tub*2
Cryptoperidiniopsis brodyi	Cryptoperidiniopsis brodyi II				DQ991372	CBDE1 (Australia)
Cryptoperidiniopsis brodyi	Cryptoperidiniopsis brodyi I				DQ991375	CBDE14 (Australia)
Cryptoperidiniopsis brodyi	Cryptoperidiniopsis brodyi III				DQ991373	CBDE2 (Australia)
Cryptoperidiniopsis brodyi	Cryptoperidiniopsis brodyi III				DQ991376	CBHU1 (Australia)
Cryptoperidiniopsis brodyi	Cryptoperidiniopsis brodyi III				DQ991377	CBHU2 (Australia)
Cryptoperidiniopsis brodyi	Cryptoperidiniopsis brodyi III				DQ991378	CBSA4 (Australia)
Cryptoperidiniopsis brodyi	Cryptoperidiniopsis brodyi I				DQ991374	CBDE10 (Australia)
Cryptoperidiniopsis brodyi	Cryptoperidiniopsis brodyi II				DQ991379	CBWA11 (Australia)
Cryptoperidiniopsis brodyi gen. sp. nov	Cryptoperidiniopsis brodyi gen. sp. nov				AY590481	Folly C5 (USA)
Cryptoperidiniopsoid sp.	Cryptoperidiniopsis sp. group 1				AY245690	H/V14 (USA)
Cryptoperidiniopsoid sp.	Cryptoperidiniopsoid sp.				AY245691	PLO21 (USA)
Cryptoperidiniopsis brodyi gen. sp. nov	Cryptoperidiniopsis brodyi gen. sp. nov				AY590486	NOAA Beach (USA)
Cryptoperidiniopsoid sp. brodyi	Cryptoperidiniopsis sp. group 1				AF352351	CbrV28ITSC3_5_9_16_18 (USA)
Dinophyceae	Antarctic Karlodinium sp.	GQ501253	Kareniaceae	DINO926-08	FJ823536	RS24
Dinophyceae	Antarctic Karlodinium sp.			DINO854-07	FJ823535.1	W5-1
Jeong2006-1	Jeong2006-1				AM408889	Jeong2006-1
Shepherds Crook	Shepherds Crook				AY590479	Shepherds Crook
Glenodinium hallii	Heterocapsa group 1			DINO891-08	JQ972674	CCMP 2770
Gonyaulax spinifera	Gonyaulax spinifera				AF051832	None given
Gymnodinium aureolum (now Gyrodinium aureolum)	Gyrodinium aureolum Korea				DQ779991	GrAr01
Gymnodinium aureolum (now Gyrodinium aureolum)	Gyrodinium aureolum Namibia				AY999082	SWA 16
Gymnodinium catenatum	Gymnodinium catenatum	GQ501230	Gymnodinium catenatum	DINOB770-08	FJ823549.1	CS-301/05
Gymnodinium catenatum	Gymnodinium catenatum	GQ501229	Gymnodinium catenatum	DINOB760-08	FJ823542.1	CS-301/06
Gymnodinium catenatum	Gymnodinium catenatum	GQ501232	Gymnodinium sp.	DINOB740-08	FJ823538.1	CS-301/08
Gymnodinium catenatum	Gymnodinium catenatum			DINOB739-08	FJ823537.1	CS-302/11
Gymnodinium catenatum	Gymnodinium catenatum			DINOB767-08	FJ823551.1	CS-302/15
Gymnodinium catenatum	Gymnodinium catenatum	GQ501220	Gymnodinium catenatum	DINOB762-08	FJ823544.1	CS-302/16
Gymnodinium catenatum	Gymnodinium catenatum	GQ501222	Gymnodinium catenatum	DINOB745-08	FJ823539.1	CS-302/20
Gymnodinium catenatum	Gymnodinium catenatum	GQ501219	Gymnodinium sp.	DINOB759-08	FJ823541.1	CS-309/03
Gymnodinium catenatum	Gymnodinium catenatum			DINOB761-08	FJ823543	CS-392/02
Gymnodinium catenatum	Gymnodinium catenatum	GQ501224	Gymnodinium catenatum	DINOB968-08	FJ823550	CS-393/14
Gymnodinium catenatum	Gymnodinium catenatum	GQ501228	Gymnodinium catenatum	DINOB763-08	FJ823545.1	CS-396/02
Gymnodinium catenatum	Gymnodinium catenatum	GQ501226	Gymnodinium catenatum	DINOB769-08	FJ823548.1	CS-396/03
Gymnodinium catenatum	Gymnodinium catenatum	GQ501225	Gymnodinium sp.	DINOB758-08	FJ823540.1	CS-397
Gymnodinium catenatum	Gymnodinium catenatum			DINOB765-08	FJ823546.1	CS-799
Gymnodinium catenatum	Gymnodinium catenatum	GQ501227	Gymnodinium catenatum	DINOB766-08	FJ823547.1	CS-800
Gymnodinium catenatum	Undetermined				AF208247	GC19V
Gymnodinium catenatum	Gymnodinium catenatum				AY506575	CCVIEO GC11V
Gymnodinium catenatum	Gymnodinium catenatum				AY506576	CCVIEO GC12V
Gymnodinium catenatum	Gymnodinium catenatum				AY506574	CCVIEO GC9V
Gymnodinium fuscum	Gymnodinium fuscum			DINO1169-08	JQ972675	CCMP 1677
Gymnodinium impudicum	Gymnodinium impudicum			DINO884-08	FJ823552.1	CCMP 1678
Gymnodinium impudicum	Gymnodinium impudicum	GQ501235	Gymnodinium impudicum	DINO1177-08	FJ823553.1	CCMP 2214
Gymnodinium impudicum	Gymnodinium impudicum				DQ779993	GrIp02
Gymnodinium maguelonnense	Gymnodinium maguelonnense				AF318225	GM94GAB 53/15
Gymnodinium simplex	Gymnodinium simplex			DINO1183-08	JQ972688	CCAP 1173/3
Gymnodinium sp.	Symbiodinium sp. clade E2-2	GQ501241	Symbiodinium sp.	DINO929-08	FJ823554.1	AC 561
Gymnodinium sp.	Gymnodinium sp.				AF318247	Chile_53/16
Gymnodinium sp.	Gymnodinium sp.				AM184202	CNR-1
Gymnodinium sp.	Gymnodinium aureolum				AM184203	IRTA-1
Symbiodinium sp.	Symbiodinium sp. clade E2-2	GQ501242	Symbiodinium sp.	DINO1227-08	JQ972676	NEPCC 795
Gymnodium sp.	Heterocapsa niei			DINO659-07	JQ991005	CCMP 424
Gyrodinium instriatum	Gyrodinium instriatum			DINO923-08	JQ972685	CCMP 431
Gyrodinium instriatum	Gyrodinium dorsum	GQ501244	Gyrodinium instriatum	DINO1175-08	JQ972686	NEPCC 796
Gyrodinium instriatum	Gyrodinium group 2				DQ084523	GIXM01
Gyrodinium instriatum	Gyrodinium instriatum			DINO924-08	JQ972684	CCMP 432
Gyrodinium instriatum	Gyrodinium group 2				AJ534383	clone 02
Gyrodinium instriatum	Gyrodinium group 2				AJ534386	clone 09
Gyrodinium instriatum	Gyrodinium group 2				AJ534387	clone 15
Gyrodinium instriatum	Gyrodinium group 2				AJ534388	clone 18
Gyrodinium dorsum	Gyrodinium dorsum			DINO549-07	FJ823555.1	UTEX 2334
Heterocapsa arctica	Heterocapsa arctica			DINO1192-08	JQ972677	CCMP 445
Heterocapsa arctica	Heterocapsa arctica				AB084095	CCMP 445
Heterocapsa circularisquama	Heterocapsa circularisquama				AB084091	OK3
Heterocapsa circularisquama	Heterocapsa circularisquama				AB084089	OA1
Heterocapsa circularisquama	Heterocapsa circularisquama				AB084090	OK1
Heterocapsa illdefina	Heterocapsa illdefina			DINO1176-08	JQ972687	CCMP 446
Heterocapsa illdefina	Heterocapsa illdefina				AB084092	CCMP 446
Heterocapsa niei	Heterocapsa pseudotriquetra			DINO1223-08	FJ823556.1	UTEX 2722
Heterocapsa niei	Heterocapsa niei			DINOB780-08	FJ823557.1	CS-36
Heterocapsa pygmaea	Heterocapsa group 1				AB084093	CCMP 1322
Heterocapsa pygmaea	Heterocapsa pygmeae				AB084094	CCMP 1490
Heterocapsa pygmeae	Heterocapsa pygmeae			DINO1221-08	FJ823558.1	UTEX 2421
Heterocapsa triquetra	Heterocapsa triquetra			DINO861-08	FJ823559.1	CCMP 450
Heterocapsa horiguchii	Heterocapsa horiguchii				AB084097	FK6-D47
Heterocapsa pseudotriquetra	Heterocapsa pseudotriquetra				AB084100	NIES-473
Heterocapsa ovata	Heterocapsa ovata				AB084098	NIES-472
Heterocapsa horiguchii	Heterocapsa horiguchii				AB084099	NIES-614
Heterocapsa lanceolata	Heterocapsa lanceolata				AB084096	TK6-D57
Heterocapsa sp.	Heterocapsa pseudotriquetra				AY499509	GeoB 222
Heterocapsa triquetra	Heterocapsa triquetra			DINO1180-08	JQ972678	NEPCC 900
Heterocapsa triquetra	Heterocapsa triquetra				AF208249	HT-1
Heterocapsa triquetra	Heterocapsa triquetra				AF527816	CCMP 448
Heterocapsa triquetra	Heterocapsa pygmeae				AF352364	clone HtrITSC3
Heterocapsa triquetra	Heterocapsa triquetra				AB084101	NIES 7
Karenia bidigitata	Karenia bidigitata			DINOB790-08	FJ823561.1	CAWD 80
Karenia bidigitata	Karenia bidigitata			DINOB825-08	FJ823560.1	CAWD 92
Karenia brevis	Karenia brevis	GQ501249	Karenia brevis	DINO865-08	FJ823562.1	CCMP 2281
Karenia brevis	Karenia brevis	GQ501250	Karenia brevis	DINO876-08	FJ823563.1	CCMP 718
Karenia mikimotoi	Karenia mikimotoi			DINO916-08	JQ972679	CCMP 430
Karenia mikimotoi	Karenia mikimotoi			DINO766-07	FJ823564.1	NEPCC 665
Karenia papilionaceum	Karenia papilionaceum			DINOB828-08	FJ823565.1	CAWD 91
Karenia sp.	Karenia mikimotoi	GQ501252	Karenia sp.		AM184206	CCMP 429
Karenia umbella	Karenia umbella			DINOB840-08	FJ823566.1	CAWD 131
Karlodinium armiger	Karlodinium armiger				AJ557024	GC7 IRTA
Karlodinium armiger	Karlodinium armiger				AM184204	GC2 IRTA
Karlodinium armiger	Karlodinium armiger				AM184205	GC3 IRTA
Karlodinium veneficum	Karlodinium veneficum group 2			DINO890-08	FJ823568.1	CCMP 1975
Karlodinium veneficum	Karlodinium veneficum group 2			DINO913-08	FJ823567.1	CCMP 416
Karlodinium veneficum	Karlodinium veneficum group 1	GQ501257	Karlodinium veneficum		AJ557026	CCMP 415
Karlodinium veneficum	Karlodinium veneficum group 2				AF352365	clone GgaITS C4_J7_32_34
Karlodinium veneficum	Karlodinium veneficum group 2				AF352367	clone GgaITSC36
Karlodinium veneficum	Karlodinium veneficum group 1				DQ459434	NMBjah047
Karlodinium veneficum	Karlodinium veneficum group 1				AY245692	Pim05JulC4
Karlodinium veneficum	Karlodinium veneficum group 2				AF352366	clone GgaITSC35
Karlodinium veneficum	Karlodinium veneficum group 1			DINOB793-08	FJ823569.1	CAWD 83
Karlodinium veneficum	Karlodinium veneficum group 1				AJ557028	GC5 IRTA
Karlodinium veneficum	Karlodinium veneficum group 1				AJ557027	GC8 IRTA
Karlodinium veneficum	Karlodinium veneficum group 1				AJ534656	CG1 CSIC-1
Kryptoperidinium foliaceum	Kryptoperidinium foliaceum			DINOB781-08	FJ823570	CS-37
Lepidodinium viride	Lepidodinium viride				DQ499645	culture sample from Dr. R.N. Pienaar
Lingulodinium polyedrum	Lingulodinium polyedrum	GQ501267	Gonyaulacaceae	DINO1165-08	FJ823577.1	CCAP 1121/2
Lingulodinium polyedrum	Lingulodinium polyedrum	GQ501264	Gonyaulacaceae	DINO1205-08	FJ823576.1	CCAP 1121/5
Lingulodinium polyedrum	Lingulodinium polyedrum	HM236198	Gonyaulacaceae	DINO886-08	FJ823571.1	CCMP 1738
Lingulodinium polyedrum	Lingulodinium polyedrum	GQ501265	Gonyaulacaceae	DINO880-08	FJ823574.1	CCMP 1932
Lingulodinium polyedrum	Lingulodinium polyedrum	GQ501266	Gonyaulacaceae	DINO882-08	FJ823575.1	CCMP 1933
Lingulodinium polyedrum	Lingulodinium polyedrum			DINO875-08	FJ823573.1	CCMP 1934
Lingulodinium polyedrum	Lingulodinium polyedrum	GQ501263	Gonyaulacaceae	DINO866-08	FJ823572.1	CCMP 1935
Lingulodinium polyedrum	Lingulodinium polyedrum				EU177126	None given
Lingulodinium polyedrum	Lingulodinium polyedrum				AF377944	None given
Oxyrrhis marina clade 1 (Lowe et al. 2010)	Oxyrrhis marina clade I				AY566418	CCAP 1133/3
Oxyrrhis marina clade 4 (Lowe et al. 2010)	Oxyrrhis marina clade IV				AY566417	CCAP 1133/4
Oxyrrhis marina clade 4 (Lowe et al. 2010)	Oxyrrhis marina clade IV				AY566416	CCAP 1133/5
Oxyrrhis marina group clade 2 (Lowe et al. 2010)	Oxyrrhis marina group clade II				AY566413	CCMP 1739
Oxyrrhis marina group clade 2 (Lowe et al. 2010)	Oxyrrhis marina group clade II				AY566412	CCMP 1788
Oxyrrhis marina group clade 2 (Lowe et al. 2010)	Oxyrrhis marina group clade II				AY566411	CCMP 1795
Oxyrrhis marina group clade 2 (Lowe et al. 2010)	Oxyrrhis marina group clade II				AY566415	CCMP 604
Oxyrrhis marina group clade 2 (Lowe et al. 2010)	Oxyrrhis marina group clade II				AY566414	CCMP 605
Peridinium aciculiferum	Peridinium aciculiferum				EF417293	PASP2
Peridinium aciculiferum	Peridinium aciculiferum				AY970649	PAER-1
Peridinium aciculiferum	Peridinium aciculiferum				EF417299	PASP10
Peridinium aciculiferum	Peridinium aciculiferum				EF417300	PASP11
Peridinium aciculiferum	Peridinium aciculiferum				AY970651	PAER-9
Peridinium aciculiferum	Peridinium aciculiferum				EF417289	PABR3
Peridinium cinctum	Peridinium cinctum group 1			DINO1028-08	FJ823578.1	CCAP 1140/1
Peridinium cinctum	Peridinium cinctum group 2				AY499511	CCAC 0102
Kryptoperidinium foliaceum	Kryptoperidinium foliaceum			DINO409-07	JQ972689	UTEX 1688
Peridinium inconspicuum	Peridinium inconspicuum	GQ501269	Peridinium inconspicuum	DINO405-07	FJ823579.1	UTEX 2255
Peridinium willei	Peridinium willei				AY499510	From Rengefors lab
Perkinsus olseni	Perkinsus olseni				EU871715	VNTC
Pfiesteria piscicida	Pfiesteria piscicida				AY112746	None
Pfiesteria-like	Luciella Masanensis Ribotype group I			DINO902-08	JQ972690	CCMP1955
Luciella Masanensis Ribotype group II	Luciella Masanensis Ribotype group II				AY245689	Lucy
Luciella Masanensis Ribotype group I	Luciella Masanensis Ribotype group I				AM050345	Jeju Lucy-200504
Luciella Masanensis Ribotype group I	Luciella Masanensis Ribotype group I				AM050344	Masan Lucy-2005
Pfiesteria shumwayae	Pfiesteria shumwayae			DINO1125-08	JQ972683	103253 (CCMP2357)
Luciella Masanensis Ribotype group I	Luciella Masanensis Ribotype group I				AY590482	HR1NovC5
Luciella Masanensis Ribotype group IV	Luciella Masanensis Ribotype group IV				AY590483	HR1SSeptA5
Pfiesteria-like sp.	Pfiesteria-like sp.				AY590485	NC Lucy-V27
Polarella glacialis	Polarella glacialis	GQ501282	Polarella glacialis	DINO1190-08	FJ823580	CCMP 1383
Polarella glacialis	Polarella glacialis	GQ501283	Polarella glacialis	DINO1161-08	AY179607	CCMP 2088
possible Hemidinium/Bernardinium	possible Hemidinium/Bernardinium			DINO1121-08	JQ972682	103248
Unknown, Possible Katodinium asymmetricum	Heterocapsa group 1			DINO965-08	JQ972681	103238
Unknown, Possible Katodinium asymmetricum	possible Katodinium asymmetricum			DINO964-08	JQ972680	103249
Prorocentrum dentatum	Prorocentrum dentatum				EF025382	CCMP 1517
Prorocentrum dentatum	Prorocentrum dentatum			DINO927-08	FJ823581.1	RCC 848
Prorocentrum lima	Prorocentrum lima			DINO968-08	FJ823582.1	CCAP 1136/9
Prorocentrum lima	Prorocentrum micans	GQ501287	Prorocentrum lima	DINO934-08	JQ972691	CCMP 1746
Prorocentrum mexicanum	Prorocentrum mexicanum				AY886763	None given
Prorocentrum micans	Prorocentrum micans			DINO1168-08	FJ823584.1	CCAP 1136/18
Prorocentrum micans	Prorocentrum micans				EU244467	PM1V
Prorocentrum micans	Prorocentrum micans				AF370879	clone PM7-16/C5
Prorocentrum micans	Prorocentrum micans				AF208245	PMC-1
Prorocentrum micans	Prorocentrum micans				AF370878	PM17-01/C8
Prorocentrum minimum	Prorocentrum minimum	GQ501297	Prorocentrum minimum	DINO1167-08	FJ823587.1	CCAP 1136/16
Prorocentrum minimum	Prorocentrum minimum				AF208244	PMN-1
Prorocentrum minimum	Prorocentrum minimum				DQ054538	PMDH01
Prorocentrum minimum	Prorocentrum dentatum				DQ662403	None given
Prorocentrum minimum	Prorocentrum minimum				EU244473	AND3V
Prorocentrum minimum	Undetermined				EU244472	VGO365
Prorocentrum minimum	Prorocentrum minimum				AF352370	PmiITSC2_8_9
Prorocentrum minimum	Prorocentrum dentatum			DINO938-08	FJ823585.1	RCC 922
Prorocentrum minimum	Prorocentrum minimum			DINO935-08	FJ823586.1	RCC 291
Prorocentrum rostratum	Prorocentrum dentatum				EU244471	PR1V
Protoceratium reticulatum	Undetermined			DINO912-08	FJ823588	CCMP 1889
Protoceratium reticulatum	Undetermined	GQ501300	Gonyaulacaceae	DINO1178-08	FJ823589	CCMP 1720
Protoceratium reticulatum	Protoceratium reticulatum				EF642972	15
Protoceratium reticulatum	Protoceratium reticulatum				AM183800	CBA-1
Protodinium sp.	Protodinium sp.			DINO914-08	FJ823590	CCMP 419
Pyrodinium bahamense var. compressum	Pyrodinium bahamense var. compressum				AF051366	clone PBSA03
Pyrodinium bahamense var. compressum	Pyrodinium bahamense var. compressum				AF145225	clone PBSA07
Scrippsiella cf. precaria	Scrippsiella cf. precaria	GQ501311	Calciodinelloideae	DINOB784-08	FJ823591.1	CS-294/3
Scrippsiella faroense	Scrippsiella faroense			DINO1163-08	FJ823592.1	CCMP 771
Scrippsiella lachrymosa	Scrippsiella faroense	GQ501310	Calciodinelloideae	DINO427-07	JQ972692	CCMP 2666
Scrippsiella cf. precaria	Scrippsiella cf. precaria	GQ501313	Calciodinelloideae	DINOB782-08	FJ823593.1	CS-294/6
Scrippsiella sp.	Scrippsiella sp. group 1			DINOB785-08	FJ823594.1	CS-168
Scrippsiella sp.	Scrippsiella sp. group 1			DINOB970-08	FJ823595.1	CS-295/8
Scrippsiella sp.	Scrippsiella sp. group 1			DINO698-07	FJ823596.1	CS-295/C
Scrippsiella sp.	Scrippsiella trochoidea III	GQ501321	Scrippsiella trochoidea	DINO1208-08	FJ823597.1	CCAP 1134/9
Scrippsiella sp.	Scrippsiella trochoidea II				AY728079	D1006
Scrippsiella sp.	Scrippsiella sp. group 1				AY499533	CS-168
Scrippsiella sp.	Scrippsiella trochoidea II				AY499525	GeoB 138
Scrippsiella sp.	Scrippsiella trochoidea I				AY499524	GeoB 188
Scrippsiella sp.	Undetermined				EU325946	SSND12
Scrippsiella sweeneyae	Scrippsiella sweeneyae				AY499520	NIES 684
Scrippsiella trochoidea	Scrippsiella trochoidea III			DINO1033-08	FJ823598.1	RCC91
Scrippsiella trochoidea	Scrippsiella trochoidea III			DINO1196-08	FJ823599.1	CCMP 1599
Scrippsiella trochoidea	Scrippsiella trochoidea III				AY499530	NIES 369
Scrippsiella trochoidea	Scrippsiella trochoidea V				EU325956	SSND20
Scrippsiella trochoidea	Scrippsiella trochoidea I				AY676158	GeoB*201
Scrippsiella trochoidea	Scrippsiella trochoidea I				AY676163	IO 26-01
Scrippsiella trochoidea	Scrippsiella trochoidea III				EU370963	ST-1
Scrippsiella trochoidea	Scrippsiella trochoidea I				EU325959	STGX01
Scrippsiella trochoidea	Scrippsiella trochoidea II				EU325957	STND01
Scrippsiella trochoidea	Scrippsiella trochoidea V				EF584455	SCPC36
Scrippsiella trochoidea	Scrippsiella trochoidea V				EF584456	SCPC73
Scrippsiella trochoidea	Scrippsiella trochoidea I				AY676157	GeoB*200
Scrippsiella trochoidea	Scrippsiella trochoidea II				AY676160	GeoB*214
Scrippsiella trochoidea	Scrippsiella trochoidea IV				EU370962	ST-D6
Scrippsiella trochoidea	Scrippsiella trochoidea IV				EU325958	STND02
Symbiodinium goreaui clade C1	Symbiodinium sp. group C1	GQ501334	Symbiodinium sp. clade C/F	DINO1171-08	FJ823600.1	CCMP 2466
Symbiodinium kawagutii, clade F1	Symbiodinium group F	GQ501335	Symbiodinium clade F	DINO1195-08	FJ823601.1	CCMP 2468
Symbiodinium microadriaticum	Symbiodinium sp. group A2			DINO1184-08	FJ823605.1	NEPCC 411
Symbiodinium microadriaticum	Symbiodinium sp. group E2-1			DINO356-07	FJ823603.1	NEPCC 737
Symbiodinium microadriaticum	Symbiodinium sp. group E2-2			DINO979-08	JQ991006	NEPCC 860
Symbiodinium sp. clade A1	Symbiodinium sp. group A1/1.1			DINO896-08	FJ823602.1	CCMP 2464
Symbiodinium microadriaticum, clade A1	Symbiodinium sp. group A1/1.1	GQ501341	Symbiodinium clade A1	DINO1172-08	FJ823606.1	CCMP 2467
Symbiodinium microadriaticum, Clade A1.1	Symbiodinium sp. group A1/1.1			DINO881-08	FJ823604.1	CCMP 2469
Symbiodinium pilosum, Clade A2	Symbiodinium sp. group A2	GQ501337	Symbiodinium sp. clade A2	DINO1185-08	FJ823607.1	CCMP 2461
Symbiodinium sp. (Cp A194)	Undetermined	GQ501351	Symbiodinium sp. clade A3	DINOB816-08	FJ823625.1	MAC-04-218 SCI.01(Acp 03.04)
Symbiodinium sp. A3 (Cp A198)	Symbiodinium sp. group A3	GQ501352	Symbiodinium sp. clade A3	DINOB817-08	FJ823626.1	MAC-CassELI
Symbiodinium sp. A1 (Cp A194)	Symbiodinium sp. group A1/1.1	GQ501376	Symbiodinium sp. clade Ax	DINOB818-08	FJ823627.1	MAC- CassKB8
Symbiodinium sp.	Symbiodinium sp. group A, unknown			DINO874-08	FJ823639.1	CCMP 2429
Symbiodinium sp.	Symbiodinium sp. group 1			DINO899-08	FJ823630.1	CCMP 2428
Symbiodinium sp.	Symbiodinium sp. group 1	AY289695	Undetermined	DINO1194-08	FJ823635.1	CCMP 2431
Symbiodinium sp.	Symbiodinium sp. clade A3	GQ501382	Symbiodinium clade Ax	DINO878-08	FJ823609.1	CCMP 2592
Symbiodinium sp. B1 (Cp B184)	Symbiodinium sp. clade B1	GQ501394	Symbiodinium sp. clade B	DINOB807-08	FJ823617.1	MAC-Pk 13 SD1 (DINO-25)
Symbiodinium sp. B1 (Cp B184)	Symbiodinium sp. clade B1	GQ501361	Symbiodinium sp. clade B	DINOB813-08	FJ823623.1	MAC- Gv 5.6c
Symbiodinium sp. B1 (Cp B184)	Symbiodinium sp. clade B1	GQ501347	Symbiodinium sp. clade B	DINOB824-08	FJ823637	MAC-Pk704.16-SCI
Symbiodinium sp. clade A	Symbiodinium sp. group A, unknown			DINO821-07	FJ823629.1	MAC-Mf 10.14b.06
Symbiodinium sp.	Symbiodinium sp. group C1				EF634158	DongshanTP
Symbiodinium sp.	Symbiodinium sp. group C1				AB207189	Sakura 6a
Symbiodinium sp.	Symbiodinium sp. group C1				AB207190	Yaku 3a
Symbiodinium sp.	Symbiodinium sp. group C1				AB207196	Amami7a
Symbiodinium sp.	Symbiodinium sp. group E2-2				AY160123	G15
Symbiodinium sp.	Symbiodinium sp. group C1				AY237298	Ha2
Symbiodinium sp.	Symbiodinium sp. group C1				AB190269	Kokubu 2b
Symbiodinium sp.	Symbiodinium sp. group C1				DQ480598	PtMiI1-2
Symbiodinium sp.	Symbiodinium sp. group C1				AF411414	7m
Symbiodinium sp.	Symbiodinium sp. group C1				AJ311941	9B-J 18S
Symbiodinium sp. Clade C	Symbiodinium sp. group C1				AF195144	CcFIZ
Symbiodinium sp.	Symbiodinium sp. group C1				EF634159	DongshanFS
Symbiodinium sp.	Symbiodinium sp. group C1				AY237299	Lp1
Symbiodinium sp.	Symbiodinium sp. group C1				DQ068024	Pd7.8
Symbiodinium sp.	Symbiodinium sp. group C1				DQ068025	Pd8.6
Symbiodinium sp.	Symbiodinium sp. group C1				DQ480609	PtMiI1-3
Symbiodinium sp.	Symbiodinium sp. group C1				AB207187	Sakura4b
Symbiodinium sp.	Symbiodinium sp. group C1				EU679410	SYoc1
Symbiodinium sp.	Symbiodinium sp. group C1				EU679409	SYoc3
Symbiodinium sp.	Symbiodinium sp. group C1				DQ335355	Three0501-10
Symbiodinium sp.	Symbiodinium sp. group C1				DQ335356	Three0501-11
Symbiodinium sp.	Symbiodinium sp. group C1				DQ335357	Three0501-12
Symbiodinium sp.	Symbiodinium sp. group C1				EU940369	XiaodonghaiGF
Symbiodinium sp.	Symbiodinium sp. group C1				EU118165	XuwenPT
Symbiodinium sp.	Symbiodinium sp. group C1				AB190265	Kokubu 1a
Symbiodinium sp. clade C	Symbiodinium sp. group C1				AF427469	Mp
Symbiodinium sp. clade C	Symbiodinium sp. group C1				AB294634	clone Fu-20-02
Symbiodinium sp. clade C gene	Symbiodinium sp. group C1				AB294643	clone Fu-21-05
Symbiodinium sp. ex Amphisorus hemprichii	Symbiodinium sp. group C1				EU786035	clone 280
Symbiodinium sp. ex Amphisorus hemprichii	Symbiodinium sp. group C1				EU786047	clone 358
Symbiodinium sp. type C1	Symbiodinium sp. group C1				EU074885	clone C1_1179
Symbiodinium sp. type C1	Symbiodinium sp. group C1				EU074878	clone C1 1161
Symbiodinium sp. type C1	Symbiodinium sp. group C1				EU074877	clone C1_1168
Symbiodinium sp. type C1	Symbiodinium sp. group C1				EU074966	clone C1_3134
Symbiodinium sp. type E2	Symbiodinium sp. group E2-1				EU074911	clone E2 2092
Symbiodinium sp. type E2	Symbiodinium sp. group E2-2				EU074923	clone E2 2124
Symbiodinium sp. type E2	Symbiodinium sp. group E2-2				EU074922	clone E2 2086
Symbiodinium sp., clade A1 (Cp A194)	Symbiodinium sp. group A1/1.1	GQ501396	Symbiodinium sp. Ax	DINOB805-08	FJ823615.1	MAC-K 25.1.13 (DINO-252)
Symbiodinium sp., clade A (Cp A188)	Symbiodinium sp. group A1/1.1	GQ501344	Symbiodinium sp. Ax	DINOB804-08	FJ823613.1	MAC-K 20.1.6 (DINO-357)
Symbiodinium sp. (A194, plus possible clade B)	Symbiodinium sp. group A1/1.1	GQ501364	Symbiodinium sp. Ax	DINOB801-08	FJ823611.1	MAC-K 17.1.2 (DINO-554)
Symbiodinium sp., clade A	Symbiodinium sp. group A1/1.1			DINOB806-08	FJ823616.1	MAC-JN112.3-11 (DINO225)
Symbiodinium sp., clade A1 (Cp A194)	Symbiodinium sp. group A1	GQ501359	Symbiodinium sp. Ax	DINOB812-08	FJ823622.1	MAC-Mf 10.01
Symbiodinium sp., clade A1 (Cp A194)	Symbiodinium sp. group A1	GQ501374	Symbiodinium sp. Ax	DINOB811-08	FJ823621.1	MAC-Mf 10.02a
Symbiodinium sp., clade A1 (Cp A194)	Symbiodinium sp. group A1	GQ501358	Symbiodinium sp. Ax	DINOB810-08	FJ823620	MAC-Mf 11.04b
Symbiodinium sp., clade A1 (Cp A194)	Symbiodinium sp. group A1			DINOB809-08	FJ823619.1	MAC-Mf 12.05e
Symbiodinium sp., clade A3	Symbiodinium sp. group A3	GQ501387	Symbiodinium sp. clade A3	DINO873-08	FJ823608.1	CCMP 2457
Symbiodinium sp., clade B (Cp B223)	Symbiodinium sp. group B2	GQ501365	Symbiodinium sp. clade B	DINOB802-08	FJ823612.1	MAC-K 17.1.6 (DINO-498)
Symbiodinium sp., clade B25 (Cp. 183)	Symbiodinium sp. group B1	GQ501363	Symbiodinium sp. clade B	DINOB800-08	FJ823610.1	MAC-K 17.1.9 (DINO-571)
Symbiodinium sp., clade B (Cp B223)	Symbiodinium sp. group B2	GQ501342	Symbiodinium sp. clade B	DINOB814-08	FJ823624.1	MAC-K 17.1.3 (DINO-579)
Symbiodinium sp., clade B1 (Cp A194 +B184)	Symbiodinium sp. group B1	GQ501354	Symbiodinium sp. clade B	DINO953-08	FJ823632.1	MAC-Mf 01.05b01
Symbiodinium sp., clade B1 (Cp B184)	Symbiodinium sp. group B1	GQ501355	Symbiodinium sp. clade B	DINO954-08	FJ823633.1	MAC-Mf 01.05b02
Symbiodinium sp., clade B2 (Cp. 224)	Symbiodinium sp. group B2			DINOB808-08	FJ823618	MAC-Mf 10.14b.01
Symbiodinium sp., F (Cp F178)	Symbiodinium sp. group B2			DINO943-08	FJ823631.1	MAC-201 (DINO201)
Takayama cf. pulchellum	Takayama cf. pulchellum				AY764179	TPXM
Takayama sp.	Takayama sp.				AM183261	IEO-VGO341
Thecadinium inclinatum	Thecadinium inclinatum	HM236199	Undetermined	DINO1179-08	FJ823640.1	NEPCC 682
Thoracosphaera heimii	Thoracosphaera heimii				AY728081	D056
Thoracosphaera heimii	Thoracosphaera heimii				AY327463	ThoheiD003
Unidentified dinoflagellate	Symbiodinium sp. clade A3	GQ501333	Symbiodinium sp. clade A3	DINO888-08	FJ823634.1	CCMP 2915
Woloszynskia tenuissima	Woloszynskia tenuissima		Symbiodinium sp. clade A3	DINO1174-08	FJ823641.1	NEPCC 816

## Sheet: Sheet3
		ITS Culture Collection	coi Strain name/source (synonyms)		ITS	COI
		CCAP1133/3	AC194		CCMP112	CCMP1978
		CCAP1133/4	AC195		CCMP1493	CCMP1071
		CCAP1133/5	AC210		CCMP1593	CCMP112
		CCAP1136/9	AC213		CCMP1720	CCMP113
		CCMP112	AC214		CCMP1739	CCMP115
		CCMP1493	AC222		CCMP1788	CCMP116
		CCMP1593	AC551		CCMP1795	CCMP1321
		CCMP1720	AC561		CCMP1837	CCMP1345
		CCMP1739	ACY9		CCMP1888	CCMP1383
		CCMP1788	CAWD100		CCMP1889	CCMP1589
		CCMP1795	CAWD138		CCMP415	CCMP1589-MAC
		CCMP1837	CAWD39		CCMP429	CCMP1593
		CCMP1888	CAWD51		CCMP448	CCMP1598
		CCMP1889	CAWD52		CCMP604	CCMP1633
		CCMP415	CAWD54		CCMP605	CCMP1652
		CCMP429	CAWD62			CCMP1655
		CCMP448	CAWD-84			CCMP1720
		CCMP604	CCAP1119/11			CCMP1721
		CCMP605	CCAP1136/20			CCMP1738
		CS-323/01	CCAP1140/3			CCMP1746
		CS-324/12	CCAP1119/1			CCMP1773
		CS-324/13	CCAP1119/14			CCMP1828
		CS-324/14	CCAP1121/ 2			CCMP1829
		CS-324/15	CCAP1121/5			CCMP1831
		CS-324/16	CCAP1131/1			CCMP1831
		CS-325/19	CCAP1134/1			CCMP1833
		CS-325/20	CCAP1134/9			CCMP1835
		CS-325/25	CCAP1136/16			CCMP1845
		CS-325/27	CCMP1978			CCMP1874
		CAWD 131	CCMP2281			CCMP1876
		CAWD 91	CCMP2434			CCMP1877
		CAWD 92	CCMP2459			CCMP1879
		CAWD80	CCMP2462			CCMP1880
		CAWD83	CCMP2463			CCMP1881
		CCAP1102/3	CCMP2556 (Mf2.2b)			CCMP1888
		CCAP1102-4	CCMP2724			CCMP1891
		CCAP1121/2	CCMP2726			CCMP1909
		CCAP1121/5	CCMP304			CCMP1911
		CCAP1134/9	CCMP432			CCMP1919
		CCAP1136/16	CCMP1071			CCMP1921
		CCAP1136/18	CCMP112			CCMP1932
		CCAP1140/1	CCMP113			CCMP1933
		CCAP1173/3	CCMP115			CCMP1935
		CCMP115	CCMP116			CCMP1956
		CCMP1322	CCMP1321			CCMP1958
		CCMP1383	CCMP1345			CCMP1965
		CCMP1490	CCMP1383			CCMP1969
		CCMP1517	CCMP1589			CCMP1970
		CCMP1599	CCMP1589-MAC			CCMP1971
		CCMP1677	CCMP1593			CCMP1980
		CCMP1678	CCMP1598			CCMP2079
		CCMP1738	CCMP1633			CCMP2080
		CCMP1746	CCMP1652			CCMP2082
		CCMP1932	CCMP1655			CCMP2088
		CCMP1933	CCMP1720			CCMP2089
		CCMP1934	CCMP1721			CCMP2091
		CCMP1935	CCMP1738			CCMP2181
		CCMP1955	CCMP1746			CCMP2182
		CCMP1975	CCMP1773			CCMP2214
		CCMP2088	CCMP1828			CCMP2228
		CCMP2214	CCMP1829			CCMP2229
		CCMP2281	CCMP1831			CCMP2281
		CCMP2357	CCMP1831			CCMP2281
		CCMP2428	CCMP1833			CCMP2282
		CCMP2429	CCMP1835			CCMP2283
		CCMP2431	CCMP1845			CCMP2300
		CCMP2457	CCMP1874			CCMP2301
		CCMP2461	CCMP1876			CCMP2304
		CCMP2464	CCMP1877			CCMP2362
		CCMP2466	CCMP1879			CCMP2429
		CCMP2467	CCMP1880			CCMP2430
		CCMP2468	CCMP1881			CCMP2431
		CCMP2469	CCMP1888			CCMP2432
		CCMP2592	CCMP1891			CCMP2433
		CCMP2666	CCMP1909			CCMP2434
		CCMP2770	CCMP1911			CCMP2457
		CCMP2915	CCMP1919			CCMP2459
		CCMP416	CCMP1921			CCMP2461
		CCMP419	CCMP1932			CCMP2462
		CCMP424	CCMP1933			CCMP2463
		CCMP430	CCMP1935			CCMP2466
		CCMP431	CCMP1956			CCMP2467
		CCMP432	CCMP1958			CCMP2468
		CCMP445	CCMP1965			CCMP2470
		CCMP445	CCMP1969			CCMP2556 (Mf2.2b)
		CCMP446	CCMP1970			CCMP2592
		CCMP446	CCMP1971			CCMP2634
		CCMP450	CCMP1980			CCMP2666
		CCMP718	CCMP2079			CCMP2722
		CCMP771	CCMP2080			CCMP2723
		CS-168	CCMP2082			CCMP2724
		CS-168	CCMP2088			CCMP2724
		CS-294/3	CCMP2089			CCMP2725
		CS-294/6	CCMP2091			CCMP2726
		CS-295/8	CCMP2181			CCMP2771
		CS-295/C	CCMP2182			CCMP2775
		CS-301/05	CCMP2214			CCMP2781
		CS-301/06	CCMP2228			CCMP2784
		CS-301/08	CCMP2229			CCMP2786
		CS-302/11	CCMP2281			CCMP2787
		CS-302/15	CCMP2282			CCMP2789
		CS-302/16	CCMP2283			CCMP2797
		CS-302/20	CCMP2300			CCMP2810
		CS-309/03	CCMP2301			CCMP2820
		CS-322	CCMP2304			CCMP2833
		CS-323/02	CCMP2362			CCMP2836
		CS-323/06	CCMP2429			CCMP2840
		CS-323/08	CCMP2430			CCMP2841
		CS-36	CCMP2431			CCMP2915
		CS-37	CCMP2432			CCMP2932
		CS-392/02	CCMP2433			CCMP2936
		CS-393/14	CCMP2457			CCMP304
		CS-396/02	CCMP2461			CCMP399
		CS-396/03	CCMP2466			CCMP409
		CS-397	CCMP2467			CCMP413
		CS-799	CCMP2468			CCMP415
		CS-800	CCMP2470			CCMP421
		mac-04-218 SCI.01	CCMP2592			CCMP421
		MAC-201	CCMP2634			CCMP424
		MAC-225	CCMP2666			CCMP425
		MAC-25	CCMP2722			CCMP429
		MAC-252	CCMP2723			CCMP432
		MAC-357	CCMP2724			CCMP696
		MAC-498	CCMP2725			CCMP700
		MAC-554	CCMP2771			CCMP701
		MAC-571	CCMP2775			CCMP718
		MAC-579	CCMP2781			CCMP731
		MAC-Ba18.4a	CCMP2784			CCMP732
		MAC-CassELI	CCMP2786			CCMP827
		MAC-CassKB8	CCMP2787			CCMP830
		MAC-Gv 5.6c	CCMP2789			CCMP831
		MAC-Mf 10.01	CCMP2797			CCMP832
		MAC-Mf 10.02a	CCMP2810
		MAC-Mf 10.14b.06	CCMP2820		mac-04-218 SCI.01	MAC-04-199
		MAC-Mf 11.04b	CCMP2833		MAC-201	MAC-04-218 SCI.01
		MAC-Mf 12.05e	CCMP2836		MAC-225	MAC-04-503
		MAC-Pk704.16-SCI	CCMP2840		MAC-25	MAC-202
		Mf 01.05b01	CCMP2841		MAC-252	MAC-225
		Mf 01.05b02	CCMP2915		MAC-357	MAC-25
		Mf 10.14b.01	CCMP2932		MAC-498	MAC-252
		MI7	CCMP2936		MAC-554	MAC-351
		Mp	CCMP399		MAC-571	MAC-357
		NC Lucy-V27	CCMP409		MAC-579	MAC-358
		NEPCC183	CCMP413		MAC-Ba18.4a	MAC-498
		NEPCC411	CCMP415		MAC-CassELI	MAC-554
		NEPCC665	CCMP421		MAC-CassKB8	MAC-571
		NEPCC667	CCMP421		MAC-Gv 5.6c	MAC-579
		NEPCC-682	CCMP424		MAC-Mf 10.01	MAC-677
		NEPCC737	CCMP425		MAC-Mf 10.02a	MAC-CassELI
		NEPCC-795	CCMP429		MAC-Mf 10.14b.06	MAC-CassKB8
		NEPCC-796	CCMP696		MAC-Mf 11.04b	MAC-Gv 5.6c
		NEPCC802	CCMP700		MAC-Mf 12.05e	MAC-Mf 01.05b.01 SCI.01
		NEPCC816	CCMP701		MAC-Pk704.16-SCI	MAC-Mf 01.05b.02 SCI.01
		NEPCC860	CCMP718		Mf 01.05b01	MAC-Mf 05.01Ba
		NEPCC885	CCMP731		Mf 01.05b02	MAC-Mf 06.07B
		NEPCC-900	CCMP732		Mf 10.14b.01	MAC-Mf 07.07Ba
		NIES 684	CCMP827			MAC-Mf 08.03Tc.04
		NIES 7	CCMP830			MAC-Mf 08.05Tb.03
		NIES-369	CCMP831			MAC-Mf 10.01
		NIES-472	CCMP832			MAC-Mf 10.02a
		NIES-473	CS-152			MAC-Mf 11.04b
		NIES-614	CS-155			MAC-Mf 11.15b
		RCC291	CS-157			MAC-Mf 20.04 (04-506)
		RCC749	CS-158			MAC-Mf13.03b
		RCC848	CS-160			MAC-Pdiv 44c
		RCC88	CS-161			MAC-Pdiv 45a
		RCC91	CS-162			MAC-Pk704.16 SCI
		RCC922	CS-294/3
		RS24	CS-294/6
		UTEX1688	CS-295/A		NEPCC183	NEPCC 183
		UTEX1946	CS-297		NEPCC411	NEPCC 541
		UTEX2255	CS-298		NEPCC665	NEPCC 670
		UTEX2334	CS-300/01		NEPCC667	NEPCC 682
		UTEX2418	CS-301/05		NEPCC-682	NEPCC 734
		UTEX2421	CS-301/06		NEPCC737	NEPCC15
		UTEX2722	CS-301/08		NEPCC-795	NEPCC280
		W5-1	CS-302/16		NEPCC-796	NEPCC517
			CS-302/20		NEPCC802	NEPCC667
			CS-309/03		NEPCC816	NEPCC712
			CS-312/01		NEPCC860	NEPCC795
			CS-312/02		NEPCC885	NEPCC796
			CS-312/03		NEPCC-900	NEPCC797
			CS-313/01			NEPCC820
			CS-313/04			NEPCC844
			CS-313/05			NEPCC860
			CS-313/06			NEPCC902
			CS-314/07
			CS-314/09
			CS-315
			CS-319
			CS-320/02
			CS-323/01
			CS-323/02
			CS-323/03
			CS-323/06
			CS-323/08
			CS-324/12
			CS-324/13
			CS-324/15
			CS-325/20
			CS-325/22
			CS-325/25
			CS-325/26
			CS-341
			CS-385
			CS-393/14
			CS-396/02
			CS-396/03
			CS-397
			CS-420
			CS-798/01
			CS-798/02
			CS-798/03
			CS-798/06
			CS-800
			CS-893
			MAC-04-199
			MAC-04-218 SCI.01
			MAC-04-503
			MAC-202
			MAC-225
			MAC-25
			MAC-252
			MAC-351
			MAC-357
			MAC-358
			MAC-498
			MAC-554
			MAC-571
			MAC-579
			MAC-677
			MAC-CassELI
			MAC-CassKB8
			MAC-Gv 5.6c
			MAC-Mf 01.05b.01 SCI.01
			MAC-Mf 01.05b.02 SCI.01
			MAC-Mf 05.01Ba
			MAC-Mf 06.07B
			MAC-Mf 07.07Ba
			MAC-Mf 08.03Tc.04
			MAC-Mf 08.05Tb.03
			MAC-Mf 10.01
			MAC-Mf 10.02a
			MAC-Mf 11.04b
			MAC-Mf 11.15b
			MAC-Mf 20.04 (04-506)
			MAC-Mf13.03b
			MAC-Pdiv 44c
			MAC-Pdiv 45a
			MAC-Pk704.16 SCI
			NEPCC 183
			NEPCC 541
			NEPCC 670
			NEPCC 682
			NEPCC 734
			NEPCC15
			NEPCC280
			NEPCC517
			NEPCC667
			NEPCC712
			NEPCC795
			NEPCC796
			NEPCC797
			NEPCC820
			NEPCC844
			NEPCC860
			NEPCC902
			NIES-1367
			RS-24
			Togulla jolla
			UTEX 2255
			UTEX 2504
