# Supplementary material for: Evaluating the Ribosomal Internal Transcribed Spacer (ITS) as a Candidate Dinoflagellate Barcode Marker
Source: PLoS One. 2012 Aug 16;7(8):e42780. doi: 10.1371/journal.pone.0042780 (PMC3420951; doi:10.1371/journal.pone.0042780)
Supplement: Table S2 — A comparison of dinoflagellate PWD values from four barcode studies. A: ITS, this study; B: ITS [20]; C: COB [12]; D: COI [11] and COI Prorocentrum (intraspecies only [58]). PWD were calculated by TVM_G model for COB, and uncorrected p-distances for all other barcodes. NA = data not available. Note the number of Symbiodinium taxa were recorded differently: this study and that of Stern et al. 2010 [11] identified a species by its smallest genotypic designation. Lin et al. 2009 [12] and Litaker et al. 2007 [20] used taxonomic species designations. (XLS) [file pone.0042780.s007.xls]

## Sheet: Sheet1
Table S2
	A: ITS					B: ITS
Congeneric interspecific	Min	Max	mean	no sequences	no. taxa	Min	Max	mean	no sequences	no. taxa
Alexandrium	0.117	0.342	0.246	45	7	0.0424	0.5211	0.3771	13	13
Karenia	0.078	0.1174	0.145527	23	6	0.078	0.078	0.078	2	2
Prorocentrum	0.084	0.227	0.175	16	6	0.1072	0.2551	0.2126	4	4
Scrippsiella	0.169	0.241	0.172119	19	4	0.0584	0.2343	0.1533	13	13
Symbiodinium	0.047	0.415	0.337	26	5	0.0487	0.4794	0.3505	7	7
Intraspecific	Min	Max	mean	no sequences	no taxa	Min	Max	mean	no sequences	no. taxa
Alexandrium tamarense complex (A. tamarense, A.catenella, A. fundyense)	0	0.017	0.001	39	4	0	0.0097	0.0025	4	4
Prorocentrum minimum	0	0.094	0.033	6	1	0.005	0.009	0.0072	2	2
Symbiodinium clade C1	0	0.015	0.005	33	1	0	0.007	0.002	5	1
Gymnodinium catenatum	0	0.008	0.002	19		0	0.0077	0.0011	20	20
Alexandriunm minutum complex (A. minimum, A. minutum, A. lusitanicum)	0	0	0	21	1	0	0	0	4	4
Alexandrium affine	0	0.0007	0.00405714	8	1	0	0	0	3	3
Gyrodinium instriatum	0	0.008	0.003	8	1	0	0.0066	0.0042	4	4
Karenia spp. (K. mikimotoi, K. brevis, K. bidigitata)	0	0.006	0.004	3	1	0.002	0.002	0.002	6	3
Prorocentrum micans	0.004	0.014	0.00995333	4	1	0.009	0.0054	0.0072	3	3
Scrippsiella trochoidea species complex	0	0.012	0.001	15	4	0	0.0147	0.0056	16	16
	C: cob					D: COI
Congeneric interspecific	Min	Max	mean	no. Sequences	No. taxa	Min	Max	mean	no sequences	No. taxa
Alexandrium	0	0.003	0.009	5	21	0	0.009	0.001	54	11
Karenia	0	0	0	2	1	0.002	0.003	0.003	20	2
Prorocentrum	0.009	0.07	0.036	7	35	0.005	0.0396	0.039	76	8
Scrippsiella	0.009	0.05	0.034	3	11	0	0.017	0.008	21	4
Symbiodinium	0.026	0.045	0.034	3	3	0	0.069	0.022	87	12
Intraspecific	Min	Max	mean	no. Sequences	No. taxa	Min	Max	mean	no sequences	No. taxa
Prorocentrum minimum	0.006	0.009	0.0066	4	6	0	0.094	0.0385038	6	1
Prorocentrum dentatum/P. donghaiense	0	0	0	2	1	0	0.0027	0	9	1
Polarella glacialis	0	0	0	2	1	0	0	0	2	1
